# Supplementary material
Source: PubMed Central journal article supplement (PMC5520434)
Supplement: IAI.01069-16_zii999092104s1.pdf [file IAI.01069-16_zii999092104s1.pdf]

## Supplementary Information

**Supplementary Figure 1. Analysis of binding between YopK and MATN2 truncants with mutations in the MIDAS motif.** GST pull-down assay results showed that none of these mutations influenced the binding of MTAN2 to YopK.

**Supplementary Table 1. Primers used in this study.**

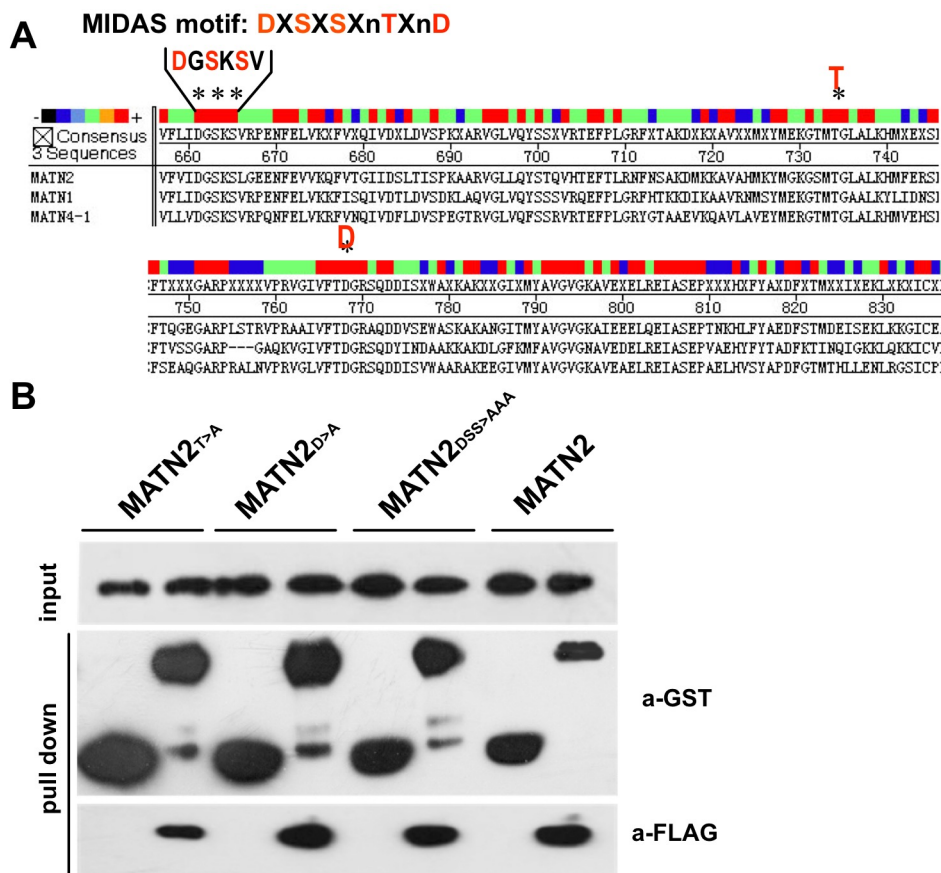

Supplementary Figure 1

**Supplementary Table 1 . Primers used in this study.**

| Primers       | Sequence (5'-3')                                            | Usages                                                                                              |
|---------------|-------------------------------------------------------------|-----------------------------------------------------------------------------------------------------|
| YopK-KF       | ATGTTTATTAAAGATACTTATAACATGCGTGCTTTATGTAGTGTAGGCTGGAGCTGCTT | Gene knockout                                                                                       |
| YopK-KR       | TCATCCCATAATACATTCTTGATCGCAGGATTCGCGACTCCATATGAATATCCTCCTTA | Gene knockout                                                                                       |
| YopK-CF       | gatcgatcCTGGCAATGAACGATAGAGC                                | Complement plasmid construction                                                                     |
| YopK-CR       | gatcggatccTCAGGAGGCAATAGATACGG                              | Complement plasmid construction                                                                     |
| YopK-Exp-F    | gatcggatccATGTTTATTAAAGATACTTATAACATGCG                     | Consturction of GST-YopK, expression plasmid                                                        |
| YopK-Exp-R    | gatcgtcgacTCATCCCATAATACATTCTTGATC                          | Consturction of GST-YopK, GST-YopK <sub>91-182</sub> and YopK <sub>A91-124</sub> expression plasmid |
| MATN2-F1      | ATGTGCGGCCGCAGGCTGTGAACACATTTGTGTGAACAGTG                   | Consturction of pFLAG-MATN2 <sub>574-903</sub> expression plasmid                                   |
| MATN2-R1      | CGACGGTACCCCTGGCCCCTTCTCCTTGGGTAAAACCTT                     | Consturction of pFLAG-MATN2 <sub>574-903</sub> expression plasmid                                   |
| MATN2-F2      | ATGTGCGGCCGCACCCCTTCCACAAGGGTGCCAGAGCAG                     | Consturction of pFLAG-MATN2 <sub>904-956</sub> expression plasmid                                   |
| MATN2-R2      | CGACGGTACCTCATCTGTATCTCAGGCGATTTCCAGG                       | Consturction of pFLAG-MATN2 <sub>904-956</sub> expression plasmid                                   |
| MATN2-F3      | ATGTGCGGCCGCAGGAAGACGGTGCAAGAAAT                            | Consturction of pFLAG-MATN2 <sub>642-892</sub> expression plasmid                                   |
| MATN2-R3      | CGACGGTACCTCTGTATCTCAGGCGATTTCCAGG                          | Consturction of pFLAG-MATN2 <sub>642-892</sub> expression plasmid                                   |
| MATN2-Mut-1-F | GACCTGGTCTTTGTGATCGCTGGATCCAAGAGTCTTGGAG                    | Consturction of pFLAG-MATN2 <sub>D&gt;A</sub> expression plasmid                                    |
| MATN2-Mut-1-R | CTCCAAGACTCTTGGATCCAGCGATCACAAAGACCAGGTC                    | Consturction of pFLAG-MATN2 <sub>D&gt;A</sub> expression plasmid                                    |
| MATN2-Mut-2-F | GGTCTTTGTGATCGATGGAGCCAAGAGTCTTGGAGAAGAG                    | Consturction of pFLAG-MATN2 <sub>D&gt;A</sub> expression plasmid                                    |
| MATN2-Mut-2-R | CTCTTCTCCAAGACTCTTGGCTCCATCGATCACAAAGACC                    | Consturction of pFLAG-MATN2 <sub>D&gt;A</sub> expression plasmid                                    |
| MATN2-Mut-3-F | GTGATCGATGGATCCAAGGCTCTTGGAGAAGAGAATTTTGAG                  | Consturction of pFLAG-MATN2 <sub>T&gt;A</sub> expression plasmid                                    |

|                |                                               |                                                                      |
|----------------|-----------------------------------------------|----------------------------------------------------------------------|
| MATN2-Mut-3-R  | CTCAAAATTCTCTTCTCCAAGAGCCTTGGATCCATCGATCAC    | Consturction of pFLAG-MATN2 <sub>T&gt;A</sub> expression plasmid     |
| MATN2-Mut-4-F  | GGGAAAGGGCTCTATGGCTGGGCTGGCCCTGAAACAC         | Consturction of pFLAG-MATN2 <sub>T&gt;A</sub> expression plasmid     |
| MATN2-Mut-4-R  | GTGTTTCAGGGCCAGCCCAGCCATAGAGCCCTTTCCC         | Consturction of pFLAG-MATN2 <sub>T&gt;A</sub> expression plasmid     |
| MATN2-Mut-5-F  | GCCATTGTGTTACCGCCGGACGGGCTCAGGATGACG          | Consturction of pFLAG-MATN2 <sub>DSS&gt;AAA</sub> expression plasmid |
| MATN2-Mut-5-R  | CGTCATCCTGAGCCCGTCCGGCGGTGAACACAATGGC         | Consturction of pFLAG-MATN2 <sub>DSS&gt;AAA</sub> expression plasmid |
| MATN2-Mut-6-F  | GACCTGGTCTTTGTGATCGCTGGAGCCAAGGCTCTTGGAGAAGAG | Consturction of pFLAG-MATN2 <sub>DSS&gt;AAA</sub> expression plasmid |
| MATN2-Mut-6-R  | CTCTTCTCCAAGAGCCTTGGCTCCAGCGATCACAAAGACCAGGTC | Consturction of pFLAG-MATN2 <sub>DSS&gt;AAA</sub> expression plasmid |
| TEM-pBBR-F     | CATGTCTAGATCTAGAATGGATCGGAGTAGGGATCGC         | Construction of pBBR1-TEM                                            |
| TEM-pBBR-R     | TCAGGAGCTCGAGCTCTTACCAATGCTTAATCAGTGAGGCAC    | Construction of pBBR1-TEM                                            |
| YopE-pBBR-F    | TCATGGTACCTGCCCGACAGGATGCTCTG                 | Clone YopE to pBBR1-TEM                                              |
| YopE-pBBR-R    | CATGTCTAGACATCAATGACAGTAATTTCTGCATC           | Clone YopE to pBBR1-TEM                                              |
| YopK-pBBR-F    | TCATGGTACCCTGGCAATGAACGATAGAGC                | Clone YopK to pBBR1-TEM                                              |
| YopK-pBBR-R    | CATGTCTAGAGGAGGCAATAGATACGG                   | Clone YopK to pBBR1-TEM                                              |
| YopK-1F        | gatcggatccATGTTTATTAAGATACTTATAACATGCG        | Consturction of GST-YopK <sub>1-60</sub> expression plasmid          |
| YopK-1R        | gatcgtcgacTTTAAGTGGTTCAATCCCTA                | Consturction of GST-YopK <sub>1-60</sub> expression plasmid          |
| YopK-2F        | gatcggatccATGTTTATTAAGATACTTATAACATGCG        | Consturction of GST-YopK <sub>1-124</sub> expression plasmid         |
| YopK-2R        | gatcgtcgacACTGTCTTTTTTCCCTATGAACAC            | Consturction of GST-YopK <sub>1-124</sub> expression plasmid         |
| YopK-3-F       | gatcggatccAGTGGATCAATATTATCTACTTTAGAAGAG      | Consturction of GST-YopK <sub>61-182</sub> expression plasmid        |
| YopK-3-R       | gatcgtcgacTCATCCATAATACATTCTTGATCGC           | Consturction of GST-YopK <sub>61-182</sub> expression plasmid        |
| YopK-4-F       | gatcggatccGACACCAATTTAAGAAACTACCC             | Consturction of GST-YopK <sub>91-182</sub> expression plasmid        |
| YopK-1-90-F    | gatcggatccATGTTTATTAAGATACTTATAACATGCG        | Amplification of 1~270 bp of <i>yopK</i>                             |
| YopK-1-90-R    | gateGAATTCAATATCGCTGACATGTTGCCATTC            | Amplification of 1~270 bp of <i>yopK</i>                             |
| YopK-125-182-F | gatcGAATTCgaagggaatatagaattttatgatc           | Amplification of 376~549 bp of <i>yopK</i>                           |
| YopK-125-182-R | gateGTCGACTCATCCATAATACATTCTTGATCGC           | Amplification of 376~549 bp of <i>yopK</i>                           |
